# Supplementary material for: Hydromorphone Hydrochloride Use During Various Interventional Radiology Procedures—Pain Control and Adverse Events: A Case Series Audit Analysis
Source: PubMed Central journal article supplement — Pain Ther. 2017 Oct 27;6(2):217–25. doi: 10.1007/s40122-017-0083-4 (PMC5693814; doi:10.1007/s40122-017-0083-4), 2017-10-27
Supplement: 40122_2017_83_MOESM1_ESM.pdf [file 40122_2017_83_MOESM1_ESM.pdf]

| Date    | Patient number | Age  | Procedure performed                | Comorbidities                                                                                         | Opiate naïve status                                                     | Start/stop time | Amt dilaudid                                                   | Amt versed                                               |
|---------|----------------|------|------------------------------------|-------------------------------------------------------------------------------------------------------|-------------------------------------------------------------------------|-----------------|----------------------------------------------------------------|----------------------------------------------------------|
| 7/31/13 | 1              | 50 F | Abscess drainage                   | Admitted 7/24 as IP for TAH for fibroids then for drainage of pelvic abscess; HTN; d/c to home 8/2/13 | Y                                                                       | 9:33a<br>10:30a | 1 mg@<br>9:55a<br>1 mg@<br>10:22a<br><br>Sum 2<br>Ave 1        | 1 mg@<br>9:56a<br>1 mg@<br>10:21a<br><br>Sum 2<br>Ave 1  |
| 7/31/13 | 2              | 59 F | TLC                                | Admitted as IP 7/31 for CP; HTN, thyroid disease; d/c 8/2                                             | Y                                                                       | 3:40p<br>5:49p  | 1 mg<br>@3:45p<br>1 mg@<br>4:27p<br><br>Sum 2<br>Ave 1         | 1 mg@<br>3:46p<br>1 mg@<br>4:27p<br><br>Sum 2<br>Ave 1   |
| 7/30/13 | 3              | 49 M | PCNL                               | Admitted as an IP 7/29 for PCNL; DM; d/c 8/1                                                          | Y                                                                       | 9a<br>9:35a     | 2 mg@<br>9:10a<br><br>Sum 2<br>Ave 2                           | 2 mg@<br>9:10a<br><br>Sum 2<br>Ave 2                     |
| 7/29/13 | 4              | 49 M | PCNL                               | Admitted as an IP 7/29 for PCNL; DM; d/c 8/1                                                          | Y                                                                       | 9:05a<br>10:15a | 1 mg@<br>9:25a<br>1 mg@<br>9:44a<br><br>Sum 2<br>Ave 1         | 2 mg@<br>9:43a<br><br>Sum 2<br>Ave 2                     |
| 7/29/13 | 5              | 61 F | Biliary drainage catheter exchange | Admitted as IP 7/28 for biliary drain leakage; cholangioCA; pancreatitis, GERD, gallstones; d/c 7/30. | Lortab (2/19), MS Contin (/24), Percocet (10/18/12), Vicodin (11/16/12) | 11a<br>12:15p   | 0.5 mg@<br>11:34a<br>0.5 mg@<br>11:51a<br><br>Sum 2<br>Ave 0.5 | 1 mg@<br>11:35a<br>1 mg@<br>11:52a<br><br>Sum 2<br>Ave 1 |
| 7/26/13 | 6              | 57 F | R iliac bone biopsy                | Admitted 7/24 as IP for LBP with mass; arthritis, metastatic sarcoma; d/c 7/26                        | Y                                                                       | 1:25p<br>2:42p  | 1 mg@<br>1:59p<br><br>Sum 1<br>Ave 1                           | 1 mg@<br>1:59p<br><br>Sum 1<br>Ave 1                     |

|         |    |      |                                |                                                                                              |                             |                  |                                                                                      |                                                                                |
|---------|----|------|--------------------------------|----------------------------------------------------------------------------------------------|-----------------------------|------------------|--------------------------------------------------------------------------------------|--------------------------------------------------------------------------------|
| 7/26/13 | 7  | 32 F | L5 biopsy                      | Admitted 7/26 as IP for leg LE pain and weakness with mass seen at L5; cervical CA, d/c 8/16 | Y                           | 9:20a<br>10:05a  | 2 mg@<br>9:43a<br><br>Sum 2<br>Ave 2                                                 | 2 mg@<br>9:43a<br><br>Sum 2<br>Ave 2                                           |
| 7/25/13 | 8  | 27 M | Infrapatellar biopsy           | Admitted 7/25 as OP for ST mass; d/c 7/25                                                    | Lortab 7/17; norco 7/11     | 11a<br>11:45a    | 1 mg@<br>10:59a<br>1 mg@<br>11:23a<br><br>Sum 2<br>Ave 1                             | 2 mg@<br>11:22a<br><br>Sum 2<br>Ave 2                                          |
| 7/24/13 | 9  | 36 F | Paraortic biopsy               | Admitted as OP 7/24 for paraortic mass bx; cervical CA, MVP, asthma; d/c 7/24                | Vicodin 7/16; Percocet 7/16 | 9:01a<br>10:41a  | 2 mg@<br>10:06a<br><br>Sum 2<br>Ave 2                                                | 2 mg@<br>10:07a<br><br>Sum 2<br>Ave 2                                          |
| 7/23/13 | 10 | 50 M | Deep pelvic and RLQ drainages  | Admitted as IP 7/22 for diverticulitis associated abd pain; d/c 7/25                         | Y                           | 3:24p<br>5:12p   | 1 mg<br>@3:56p<br>0.5<br>mg@<br>4:05p<br>0.5<br>mg@<br>4:40p<br><br>Sum 2<br>Ave .67 | 1 mg@<br>3:45p<br>0.5 mg@<br>4:03p<br>0.5 mg@<br>4:45p<br><br>Sum 2<br>Ave .67 |
| 7/23/13 | 11 | 64 F | Liver biopsy                   | Admitted 7/19 as IP for FUIO, uveitis, DM, HTN; d/c 7/27                                     | Y                           | 9:12a<br>10:35a  | 1 mg@<br>9:59a<br><br>Sum 1<br>Ave 1                                                 | 1 mg@<br>9:58a<br><br>Sum 1<br>Ave 1                                           |
| 7/22/13 | 12 | 67 F | Ascites drainage               | Admitted 7/20 as IP for pelvic mass; epilepsy, hypothyroid; d/c 7/26                         | Percocet 7/7                | 10:35a<br>11:55a | 1 mg@<br>10:54a<br><br>Sum 1<br>Ave 1                                                | 1 mg@<br>10:53a<br>1 mg@<br>11a<br><br>Sum 2<br>Ave 1                          |
| 7/22/13 | 13 | 43 M | Left pleural effusion drainage | Admitted 6/24 as IP for CABG for CAD; tonsillar abscess, HTN;                                | Norco 7/16                  | 12:50p<br>1:41p  | 1 mg@<br>1:17p                                                                       | 1 mg@<br>1:17p                                                                 |

|         |    |         |                                |                                                                                              |                                                                                                                             |                 |                                  |                 |
|---------|----|---------|--------------------------------|----------------------------------------------------------------------------------------------|-----------------------------------------------------------------------------------------------------------------------------|-----------------|----------------------------------|-----------------|
|         |    |         |                                | d/c 7/24                                                                                     |                                                                                                                             |                 | Sum 1<br>Ave 1                   | Sum 1<br>Ave 1  |
| 7/19/13 | 14 | 57<br>M | PCNL                           | Admitted 7/19 as IP<br>for PCNL; HTN, UC;<br>d/c 7/25                                        | Roxicet<br>2/22                                                                                                             | 3p<br>4p        | 1 mg@<br>3:22p<br>1 mg@<br>3:41p | 1 mg@<br>3:21p  |
|         |    |         |                                |                                                                                              |                                                                                                                             |                 | Sum 2<br>Ave 1                   | Sum 1<br>Ave 1  |
| 7/17/13 | 15 | 55<br>M | PICC                           | Admitted 7/8 as IP for<br>duodenal perf; HTN, A<br>fib, diverticulitis,<br>fistula; d/c 7/19 | Fentanyl<br>10/12;<br>Lortab<br>12/28/12;<br>norco 1/18;<br>dilaudid<br>1/18;<br>morphine<br>10/19/12;<br>Percocet<br>4/14; | 9a<br>9:42a     | 1 mg@<br>9:28a                   | 0               |
|         |    |         |                                |                                                                                              |                                                                                                                             |                 | Sum 1<br>Ave 1                   |                 |
| 7/16/13 | 16 | 29<br>M | Hepatic artery<br>embolization | Admitted 7/16 as IP<br>d/p 30 ft fall; d/c 7/21                                              | Y                                                                                                                           | 12:25p<br>2:35p | 1 mg@<br>12:51p                  | 1 mg@<br>12:50p |
|         |    |         |                                |                                                                                              |                                                                                                                             |                 | Sum 1<br>Ave 1                   | Sum 1<br>Ave 1  |
| 7/16/13 | 17 | 28<br>M | Toe biopsy                     | Admitted 7/15 as IP<br>for osteomyelitis; DM,<br>HTN; d/c 7/22                               | Y                                                                                                                           | 2:54p<br>4:02p  | 1 mg@<br>3:15p                   | 1 mg@<br>3:14p  |
|         |    |         |                                |                                                                                              |                                                                                                                             |                 | Sum 1<br>Ave 1                   | Sum 1<br>Ave 1  |
| 7/12/13 | 18 | 58<br>M | chemoembo                      | Admitted 7/11 as IP<br>for TACE; SCC of<br>larynx, HCC, HCV,<br>thyroid nodule; d/c<br>7/19  | Roxicet<br>7/3;<br>Percocet<br>6/28                                                                                         | 7:56a<br>9:05a  | 1 mg@<br>8:33a                   | 1 mg@<br>8:33a  |
|         |    |         |                                |                                                                                              |                                                                                                                             |                 | Sum 1<br>Ave 1                   | Sum 1<br>Ave 1  |
| 7/11/13 | 19 | 49 F    | Permacath                      | Admitted 7/10 as IP<br>for ESRD;<br>hypothyroidism, d/c<br>7/13                              | Y                                                                                                                           | 9a<br>10a       | 1 mg@<br>9:28a                   | 1 mg@<br>9:27a  |
|         |    |         |                                |                                                                                              |                                                                                                                             |                 | Sum 1<br>Ave 1                   | Sum 1<br>Ave 1  |
| 7/10/13 | 20 | 45 F    | PCN                            | Admitted 7/9 as IP for<br>hydronephrosis;<br>cervical CA, sepsis,                            | MS Contin<br>6/13                                                                                                           | 12:30p<br>2:09p | 0.5<br>mg@<br>1:30p              | 0.5<br>mg@1:29p |

|        |    |         |                     |                                                                                               |   |                  |                                                           |                                                                |
|--------|----|---------|---------------------|-----------------------------------------------------------------------------------------------|---|------------------|-----------------------------------------------------------|----------------------------------------------------------------|
|        |    |         |                     | decub ulcer, HCV,<br>DVT; d/c 7/11                                                            |   |                  | Sum .5<br>Ave .5                                          | Sum .5<br>Ave .5                                               |
| 7/9/13 | 21 | 54<br>M | Liver biopsy        | Admitted as OP for<br>7/9 for liver biopsy;<br>HCV, d/c 7/9                                   | Y | 10:20a<br>11:05a | 1 mg@<br>10:43a<br><br>Sum 1<br>Ave 1                     | 2 mg@<br>10:42a<br><br>Sum 2<br>Ave 2                          |
| 7/8/13 | 22 | 70<br>M | Lung biopsy         | Admitted 7/8 as OP<br>for lung bx; h/o<br>prostate CA, CVA,<br>HTN; d/c 7/8                   | Y | 8:48a<br>10:50a  | 1 mg@<br>10:10a<br><br>Sum 1<br>Ave 1                     | 1 mg@<br>10:08a<br><br>Sum 1<br>Ave 1                          |
| 7/5/13 | 23 | 61<br>M | Liver biopsy        | Admitted 7/5 as OP<br>for liver bx; HCV, HTN,<br>DM; d/c 7/5                                  | Y | 9a<br>9:55a      | 1 mg@<br>9:15a<br>1 mg@<br>9:27a<br><br>Sum 2<br>Ave 1    | 1 mg@<br>9:13a<br>1 mg@<br>9:28a<br><br>Sum 2<br>Ave 1         |
| 7/3/13 | 24 | 55<br>M | Liver biopsy        | Admitted as IP 7/1 for<br>abd pain; HBV, d/c<br>7/4                                           | Y | 11:04a<br>12:03p | 1 mg@<br>11:22a<br><br>Sum 1<br>Ave 1                     | 1 mg@<br>11:21a<br><br>Sum 1<br>Ave 1                          |
| 7/2/13 | 25 | 62 F    | Lung biopsy         | Admitted 7/2 as OP<br>for lung biopsy; anal<br>CA, rheumatoid OA;<br>d/c 7/2/13               | Y | 9:49a<br>11:05a  | 1 mg@<br>10:11a<br><br>Sum 1<br>Ave 1                     | 1 mg@<br>10:10a<br><br>Sum 1<br>Ave 1                          |
| 7/2/13 | 26 | 38<br>M | Abscess<br>drainage | Admitted 6/29 as IP<br>for abscess drainage;<br>IBD, pyoderma<br>gangrenosum, TBI; d/c<br>7/9 | Y | 2p<br>2:42p      | 2 mg@<br>2:04p<br><br>Sum 2<br>Ave 2                      | 2 mg@<br>2:03p<br><br>Sum 2<br>Ave 2                           |
| 7/2/13 | 27 | 55 F    | Lung biopsy         | Admitted 7/1 for lung<br>bx; seizure, HTN, HTN,<br>thyroid goiter; d/c 7/2                    | Y | 11:41a<br>12:20p | 1 mg@<br>11:58a<br>0.5<br>mg@<br>12:04p<br><br>Sum<br>1.5 | 1 mg@<br>11:57a<br>0.5 mg@<br>12:04p<br><br>Sum 1.5<br>Ave .75 |

|         |    |      |                       |                                                                                                                                                             |                                     |                  | Ave .75                                                  |                                                          |
|---------|----|------|-----------------------|-------------------------------------------------------------------------------------------------------------------------------------------------------------|-------------------------------------|------------------|----------------------------------------------------------|----------------------------------------------------------|
| 7/1/13  | 28 | 40 M | Peripancreatic biopsy | Admitted 6/24 as IP for diarrhea and abd pain; HIV/AIDS, chronic pancreatitis, prostate CA, HTN, abscesses; d/c 7/1                                         | Y                                   | 9:09a<br>9:55a   | 1 mg@<br>9:17a<br><br>Sum 1<br>Ave 1                     | 1 mg@<br>9:17a<br><br>Sum 1<br>Ave 1                     |
| 7/1/13  | 29 | 56 F | Liver biopsy          | Admitted 7/1 as OP for liver bx; HCV; d/c 7/1                                                                                                               | Y                                   | 10:36a<br>11:25a | 1 mg@<br>10:53a<br>1 mg@<br>11:14a<br><br>Sum 2<br>Ave 1 | 1 mg@<br>10:53a<br>1 mg@<br>11:14a<br><br>Sum 2<br>Ave 1 |
| 7/1/13  | 30 | 25 F | Left pleural drainage | Admitted 6/16 as IP with SOB, back pain and cough; PCP, AIDS, ATN, neutropenia, esophageal ulcer, seizure; d/c 7/8                                          | Y                                   | 12:23p<br>1:55p  | 1 mg@<br>1:49p<br><br>Sum 1<br>Ave 1                     | 1 mg@<br>1:49p<br><br>Sum 1<br>Ave 1                     |
| 7/1/13  | 31 | 24 M | Pelvic mass biopsy    | Admitted 6/30 as IP for pelvic mass; d/c 7/2                                                                                                                | Y                                   | 3:18p<br>3:40p   | 1 mg@<br>3:21p<br><br>Sum 1<br>Ave 1                     | 1 mg@<br>3:21p<br><br>Sum 1<br>Ave 1                     |
| 6/28/13 | 32 | 39 F | Abscess drainage      | Admitted 6/17 as IP for cecal and sigmoid masses; HTN, anemia, gastritis; d/c 6/30                                                                          | Y                                   | 8:58a<br>9:20a   | 1 mg@<br>9:07a<br>1 mg@<br>9:13a<br><br>Sum 2<br>Ave 1   | 1 mg@<br>9:06a<br><br>Sum 1<br>Ave 1                     |
| 6/26/13 | 33 | 56 F | Abscess drainage      | Admitted 6/19 as IP for hydrouretero-Nephrosis and colonic stricture; colon CA, renal caluli, hypothyroid,, hypercholesterol-Emia, hyperlipide-Mia; d/c 7/3 | Percocet 11/28/12;<br>Norco 4/22/13 | 1:21p<br>2:14p   | 1 mg@<br>1:38p<br><br>Sum 1<br>Ave 1                     | 1 mg@<br>1:37p<br>1 mg@<br>1:54p<br><br>Sum 2<br>Ave 1   |
| 6/24/13 | 34 | 53 M | Kidney biopsy         | Admitted 6/24 as OP for renal transplant                                                                                                                    | Lortab 6/3;<br>Percocet             | 10:20a<br>11:09a | 1 mg@<br>10:35a                                          | 0                                                        |

|         |    |      |                            |                                                                                                             |                          |                 |                                                                 |                                                              |
|---------|----|------|----------------------------|-------------------------------------------------------------------------------------------------------------|--------------------------|-----------------|-----------------------------------------------------------------|--------------------------------------------------------------|
|         |    |      |                            | bx; CKD, HIV, glaucoma, syphilis, anemia, CHF, arthritis; d/c 6/24                                          | 11/28/12                 |                 | 1 mg@<br>10:44a<br><br>Sum 2<br>Ave 1                           |                                                              |
| 6/19/13 | 35 | 61 M | Tunneled dialysis catheter | Admitted 6/16 with multiple med problems; colon CA, DM, HTN, CKD, renal calculi, HLD, 2dary HPT; d/c 6/20   | Norco 5/16; Percocet 5/1 | 9:56a<br>11:10a | 1 mg@<br>10:18a<br><br>Sum 1<br>Ave 1                           | 1 mg@<br>10:17a<br><br>Sum 1<br>Ave 1                        |
| 6/18/13 | 36 | 48 F | Tunneled dialysis catheter | Admitted 6/15 as IP for mult med problems; CKD, HTN, DM, COPD; d/c 6/27                                     | Lortab 4/10              | 10a<br>11:12a   | 1 mg@<br>10:36a<br>1 mg@<br>10:39a<br><br>Sum 2<br>Ave 1        | 1 mg@<br>10:35a<br>1 mg@<br>10:39a<br><br>Sum 2<br>Ave 1     |
| 6/17/13 | 37 | 53 F | Tunneled dialysis catheter | Admitted 6/15 as IP for dialysis; ESRD, DM, HLD, HTN; d/c 6/20                                              | Y                        | 9:42a<br>12:05p | 2 mg@<br>11:54a<br><br>Sum 2<br>Ave 2                           | 2 mg@<br>11:54a<br><br>Sum 2<br>Ave 2                        |
| 6/13/13 | 38 | 56 F | Liver biopsy               | Admitted 6/13 for liver bx; HTN, HCV, LBP, CKD, DM, hypercholesterolemia; d/c 6/13                          | Y                        | 12:35p<br>1p    | 1 mg@<br>12:48p<br><br>Sum 1<br>Ave 1                           | 1 mg@<br>12:47p<br><br>Sum 1<br>Ave 1                        |
| 6/13/13 | 39 | 38 F | Tunneled dialysis catheter | Admitted 6/11 as IP for dialysis; ESRD, HTN urgency; d/c 6/17                                               | Y                        | 1:17p<br>2p     | 2 mg<br>@1:41p<br><br>Sum 2<br>Ave 2                            | 2 mg<br>@1:40p<br><br>Sum 2<br>Ave 2                         |
| 6/12/13 | 40 | 53 F | Abscess drainage           | Admitted 6/10 as IP for diverticulitis; high cholesterol, asthma, HTN, thyroid disease, GERD, DVT; d/c 6/17 | Y                        | 3:07p<br>3:51p  | 1 mg@<br>3:20p<br>0.5 mg@<br>3:34p<br><br>Sum<br>1.5<br>Ave .75 | 1 mg@<br>3:20p<br>0.5 mg@<br>3:34p<br><br>Sum 1.5<br>Ave .75 |
| 6/11/13 | 41 | 50   | Biliary                    | Admitted 6/10 as IP                                                                                         | Percocet                 | 2:05p           | 1 mg@                                                           | 1 mg@                                                        |

|         |    |      |                   |                                                                                                        |                                                                         |                  |                                                          |                                           |
|---------|----|------|-------------------|--------------------------------------------------------------------------------------------------------|-------------------------------------------------------------------------|------------------|----------------------------------------------------------|-------------------------------------------|
|         |    | M    | exchange          | for obstructive jaundice; stomach CA; d/c 6/15                                                         | 4/25; lortab 7/28                                                       | 2:41p            | 2:21p<br>Sum 1<br>Ave 1                                  | 2:21p<br>Sum 1<br>Ave 1                   |
| 6/5/13  | 42 | 40 F | Liver biopsy      | Admitted 6/5 as IP for liver bx; breast CA, HTN, asthma; d/c 6/5                                       | Y                                                                       | 11:06a<br>1:05p  | 1 mg@<br>12:39p<br>1 mg@<br>12:54p<br><br>Sum 2<br>Ave 1 | 1 mg@<br>12:35p<br><br><br>Sum 1<br>Ave 1 |
| 6/5/13  | 43 | 57 M | Hepatic angiogram | Admitted 6/4 as IP for TACE; cirrhosis, osteomyelitis, anemia, spine injury, liver CA, hernia; d/c 6/5 | MS contin (5/30); oxycodone 2/27/13;                                    | 11:55a<br>12:55p | 1 mg@<br>12p<br><br>Sum 1<br>Ave 1                       | 1 mg@<br>12p<br><br>Sum 1<br>Ave 1        |
| 6/3/13  | 44 | 53 M | Renal biopsy      | Admitted 6/3 as OP for renal biopsy; HTN, glaucoma, sleep apnea, HIV, syphilis, PCP, CHF; d/c 6/3      | Percocet 11/29/12-12/9/12                                               | 12p<br>1:30p     | 1 mg@<br>1:13p<br>1 mg@<br>1:20p<br><br>Sum 2<br>Ave 1   | 1 mg@<br>1:12p<br><br><br>Sum 1<br>Ave 1  |
| 6/3/13  | 45 | 61 F | I-E biliary drain | Admitted 6/2 as IP for decreasing PTC drain output; pancreatitis, GERD, gallstones, anemia; d/c 6/3    | Lortab (2/19), MS Contin (/24), Percocet (10/18/12), Vicodin (11/16/12) | 11:21a<br>11:55a | 1 mg@<br>11:34a<br><br>Sum 1<br>Ave 1                    | 1 mg@<br>11:34a<br><br>Sum 1<br>Ave 1     |
| 5/30/13 | 46 | 60 F | Liver biopsy      | Admitted 5/30 as OP for liver bx; HTN, transaminitis; d/c 5/30                                         | Y                                                                       | 11:04a<br>12:15p | 1 mg@<br>11:35a<br><br>Sum 1<br>Ave 1                    | 1 mg@<br>11:35a<br><br>Sum 1<br>Ave 1     |
| 5/30/13 | 47 | 62 F | LN biopsy         | Admitted 5/28 as IP for mult med problems; DM, AKI, HTN; d/c 5/31                                      | Y                                                                       | 8:41a<br>11a     | 1 mg@<br>8:56a<br><br>Sum 1<br>Ave 1                     | 1 mg@<br>8:55a<br><br>Sum 1<br>Ave 1      |
| 5/30/13 | 48 | 60   | chemoembo         | Admitted 5/29 as IP                                                                                    | Roxicodone                                                              | 8:28a            | 1 mg@                                                    | 1 mg@                                     |

|         |    |      |                                  |                                                                                                                 |                 |                  |                                      |                                      |
|---------|----|------|----------------------------------|-----------------------------------------------------------------------------------------------------------------|-----------------|------------------|--------------------------------------|--------------------------------------|
|         |    | M    |                                  | for TACE; HCV, liver mass, HTN, TB, GERD; d/c 5/31                                                              | 5/16;           | 9:43a            | 9:07a                                | 9:07a                                |
|         |    |      |                                  |                                                                                                                 |                 |                  | Sum 1<br>Ave 1                       | Sum 1<br>Ave 1                       |
| 5/29/13 | 49 | 59 M | RUQ biopsy                       | Admitted 5/28 as IP for abd pain; nephrolithiasis, , lymphoma; d/c 5/30                                         | Y               | 3:19p<br>4p      | 1 mg@<br>3:32p                       | 1 mg@<br>3:30p                       |
|         |    |      |                                  |                                                                                                                 |                 |                  | Sum 1<br>Ave 1                       | Sum 1<br>Ave 1                       |
| 5/29/13 | 50 | 90 F | B PCN                            | Admitted 5/28 as IP for SOB, abd/leg pain; DM, thyroid disease, HTN; d/c 5/30                                   | Y               | 1:05p<br>2:10p   | 0.5 mg<br>@1:21p<br>0.5 mg<br>@1:22p | 0.5 mg<br>@1:21p<br>0.5 mg<br>@1:22p |
|         |    |      |                                  |                                                                                                                 |                 |                  | Sum 1<br>Ave .5                      | Sum 1<br>Ave .5                      |
| 5/25/13 | 51 | 58 M | Tunneled dialysis catheter       | Admitted as 5/25 as IP for dialysis catheter which had fallen out; CHF, ESRD, schizophrenia, HTN, HCV; d/c 5/25 | Y               | 5:35p<br>7:06p   | 0.5 mg@<br>5:46p                     | 1 mg@<br>5:45P                       |
|         |    |      |                                  |                                                                                                                 |                 |                  | Sum .5<br>Ave .5                     | Sum 1<br>Ave 1                       |
| 5/23/13 | 52 | 35 M | Perihepatic and pelvic drainages | Admitted 5/12 s/p GSW and intraabdominal abscess; d/c 5/27                                                      | Y               | 10:06a<br>11:35a | 2 mg@<br>10:51a                      | 2 mg@<br>10:35a<br>1 mg@<br>11:04a   |
|         |    |      |                                  |                                                                                                                 |                 |                  | Sum 2<br>Ave 2                       | Sum 3<br>Ave 1.5                     |
| 5/17/13 | 53 | 64 M | Tunneled dialysis catheter       | Admitted 5/16 as IP for SOB; substance abuse, HTN, DM, gout, HLD, ESRD; d/c 5/22                                | Percocet<br>5/9 | 2:45p<br>3:20p   | 1 mg@<br>3:06p                       | 1 mg@<br>3:05p                       |
|         |    |      |                                  |                                                                                                                 |                 |                  | Sum 1<br>Ave 1                       | Sum 1<br>Ave 1                       |
| 5/17/13 | 54 | 62 M | Tunneled dialysis catheter       | Admitted 5/13 as IP for SOB from CHF; pulmonary HTN, DM, HTN, CKD, CVA, CHF, CVA; d/c 5/23                      | Y               | 12:30p<br>1:25p  | 1 mg@<br>1:05p                       | 1 mg@<br>1:04p                       |
|         |    |      |                                  |                                                                                                                 |                 |                  | Sum 1<br>Ave 1                       | Sum 1<br>Ave 1                       |
| 5/16/13 | 55 | 28 F | Lung biopsy                      | Admitted 5/15 as IP for lung, adrenal and liver lesions; HIV, depression, FUO, oral                             | Y               | 1:28p<br>2:23p   | 0.5 mg@<br>1:39p                     | 0.5mg@<br>1:39p                      |



|         |    |         |                            |                                                                                                        |                      |                 |                                       |                                                        |
|---------|----|---------|----------------------------|--------------------------------------------------------------------------------------------------------|----------------------|-----------------|---------------------------------------|--------------------------------------------------------|
|         |    |         |                            | ulcer, lymphoma; d/c 5/17                                                                              |                      |                 | Sum .5<br>Ave .5                      | Sum .5<br>Ave .5                                       |
| 5/14/13 | 56 | 45<br>M | Liver biopsy               | Admitted 5/14 as OP for liver biopsy; HCV, asthma; d/c 5/14                                            | Y                    | 9:10a<br>9:25a  | 1 mg@<br>9:05a<br><br>Sum 1<br>Ave 1  | 1 mg@<br>9:04a<br><br>Sum 1<br>Ave 1                   |
| 5/10/13 | 57 | 56<br>M | RPCN                       | Admitted 5/10 as IP for drainage of blocked anastomosis of ileal conduit; HTN, DM, renal d/o; d/c 5/15 | Y                    | 1:56p<br>3p     | 1 mg@<br>2:05p<br><br>Sum 1<br>Ave 1  | 1 mg@<br>2:06p<br>1 mg@<br>2:09p<br><br>Sum 2<br>Ave 1 |
| 5/10/13 | 58 | 46 F    | Tunneled dialysis catheter | Admitted 5/8 as IP for N/V; ESRD, HTN, DM, COPD; d/c 5/13                                              | Lortab<br>4/10-4/16  | 11:24a<br>12p   | 1 mg@<br>11:33a<br><br>Sum 1<br>Ave 1 | 1 mg@<br>11:34a<br><br>Sum 1<br>Ave 1                  |
| 5/9/13  | 59 | 27<br>M | Kidney biopsy              | Admitted 5/9 as Op for kidney bx; HTN, HLD, nephritic syndrome; d/c 5/9                                | Y                    | 8:23a<br>9:40a  | 1 mg@<br>9:31a<br><br>Sum 1<br>Ave 1  | 1 mg@<br>9:31a<br><br>Sum 1<br>Ave 1                   |
| 5/8/13  | 60 | 53<br>M | Left axillary mass biopsy  | Admitted 5/4 as IP for cellulitis and axillary abscess; HTN, DM; d/c 5/9                               | Percocet<br>5/2-5/9  | 4:05p<br>4:55p  | 1 mg@<br>4:09p<br><br>Sum 1<br>Ave 1  | 1 mg@<br>4:07p<br>1 mg@<br>4:17p<br><br>Sum 2<br>Ave 1 |
| 5/8/13  | 61 | 25<br>M | Left psoas drainage        | Admitted 5/6 as IP for tx of abscess; d/c 5/13                                                         | Percocet<br>5/1-5/22 | 9:30a<br>11:15a | 1 mg@<br>10:49a<br><br>Sum 1<br>Ave 1 | 1 mg@<br>10:48a<br><br>Sum 1<br>Ave 1                  |
| 5/7/13  | 62 | 56 F    | Liver biopsy               | Admitted 5/7 as OP for liver bx; HBV, DM, HLD, HTN, CAD; d/c 5/7                                       | Y                    | 9:58a<br>10:20a | 1 mg@<br>10:11a<br><br>Sum 1<br>Ave 1 | 1 mg@<br>10:11a<br><br>Sum 1<br>Ave 1                  |
| 5/6/13  | 63 | 44<br>M | biloma                     | Admitted 4/22 for MVA with bowel                                                                       | Y                    | 3:10p<br>4p     | 1 mg@<br>3:22p                        | 1 mg@<br>3:22p                                         |



|         |    |      |                    |                                                                                                                 |                                                                                                     |                 | Ave .5                                                 | Ave 1                                                                    |
|---------|----|------|--------------------|-----------------------------------------------------------------------------------------------------------------|-----------------------------------------------------------------------------------------------------|-----------------|--------------------------------------------------------|--------------------------------------------------------------------------|
| 4/30/13 | 70 | 52 F | Liver biopsy       | Admitted 4/30 for liver bx; HCV, STD, DUB; d/c 4/30                                                             | Y                                                                                                   | 9:40a<br>10:15a | 1 mg@<br>9:44a<br><br>Sum 1<br>Ave 1                   | 1 mg@<br>9:43a<br><br>Sum 1<br>Ave 1                                     |
| 4/30/13 | 71 | 44 M | Biloma drainage    | Admitted 4/22 for MVA with bowel evisceration and liver lac; d/c 5/9                                            | Y                                                                                                   | 2:27p<br>3:22p  | 2 mg@<br>2:32P<br><br>Sum 2<br>Ave 2                   | 1 mg@<br>2:33P<br><br>Sum 1<br>Ave 1                                     |
| 4/30/13 | 72 | 24 M | IVC filter removal | Admitted 4/30 as an OP for IVC filter removal; PE, sickle cell disease, pneumonia, osteomyelitis, HTN; d/c 4/30 | Dilaudid 11/3/12;<br>Percocet 1/3/13;<br>roxicet 4/1/12;<br>roxicodone 3/1/13;<br>Percocet 7/28/12[ | 9:02a<br>9:30a  | 1 mg@<br>9:10a<br>1 mg@<br>9:12a<br><br>Sum 2<br>Ave 2 | 1 mg@<br>9:09a<br>1 mg@<br>9:10a<br>1 mg@<br>9:24a<br><br>Sum 3<br>Ave 1 |
| 4/29/13 | 73 | 58 M | Liver biopsy       | Admitted as OP for liver bx; HCV, HTN; d/c 4/29                                                                 | Y                                                                                                   | 8:26a<br>9 a    | 1 mg@<br>8:41a<br><br>Sum 1<br>Ave 1                   | 1 mg@<br>8:41a<br><br>Sum 1<br>Ave 1                                     |
| 4/29/13 | 74 | 62 M | Lung biopsy        | Admitted as OP for lung bx 4/29; CA, arthritis; d/c 4/29                                                        | Vicodin 4/18-5/7/13                                                                                 | 9:47a<br>10:45a | 1 mg@<br>10:19a<br><br>Sum 1<br>Ave 1                  | 1 mg@<br>10:19a<br><br>Sum 1<br>Ave 1                                    |
| 4/29/13 | 75 | 49 F | TJLB               | Admitted 4/29 as OP for TJLB; HTN, DM, HCV; d/c 4/29                                                            | Y                                                                                                   | 9:23a<br>11a    | 1 mg@<br>9:59a<br><br>Sum 1<br>Ave 1                   | 1 mg@<br>9:59a<br>1 mg@<br>10:28a<br><br>Sum 2<br>Ave 1                  |
| 4/25/13 | 76 | 39 F | Liver biopsy       | Admitted 4/25 as OP for liver bx; HIV, breast CA, anemia; d/c 4/25                                              | Percocet 3/26/13 - 4/5/13                                                                           | 9:56a<br>10:55a | 1 mg@<br>10:15a<br><br>Sum 1<br>Ave 1                  | 1 mg@<br>10:15a<br><br>Sum 1<br>Ave 1                                    |

|         |    |         |                           |                                                                                                                                                     |                                                                     |                  |                   |                    |
|---------|----|---------|---------------------------|-----------------------------------------------------------------------------------------------------------------------------------------------------|---------------------------------------------------------------------|------------------|-------------------|--------------------|
| 4/24/13 | 77 | 44<br>M | Lung bx                   | Admitted 3/24 as IP for hemothorax with lung mass; CKD, HLD, CAD, CA, tremors, sinusitis; d/c 4/29                                                  | Y                                                                   | 2:23p<br>4:35p   | 1 mg@<br>4:15p    | 1 mg@<br>3:01p     |
|         |    |         |                           |                                                                                                                                                     |                                                                     |                  | Sum 1<br>Ave 1    | Sum 1<br>Ave 1     |
| 4/24/13 | 78 | 57<br>M | Liver bx                  | Admitted 4/24 for liver bx; cirrhosis, osteomyelitis, anemia, hernia, liver CA                                                                      | Oxycodone<br>2/27/13 –<br>7/28/13                                   | 10:15a<br>11a    | 1 mg@<br>10:32a   | 1 mg@<br>10:31a    |
|         |    |         |                           |                                                                                                                                                     |                                                                     |                  | Sum 1<br>Ave 1    | Sum 1<br>Ave 1     |
| 4/24/13 | 79 | 28<br>M | Tunneled catheter removal | Admitted 4/24 as OP for catheter removal; resp failure, anemia; heart attack; colon injury, kidney injury; ileus; liver injury; GSW; ARDS; d/c 4/24 | Percocet<br>3/30/13 –<br>4/8/13;<br>roxicet<br>4/18/13 –<br>4/29/13 | 9:55a<br>10:20a  | 1 mg@<br>10:07a   | 1 mg@<br>10:06a    |
|         |    |         |                           |                                                                                                                                                     |                                                                     |                  | Sum 1<br>Ave 1    | Sum 1<br>Ave 1     |
| 4/24/13 | 80 | 60<br>M | Chemoembo                 | Admitted 4/23 as IP for TACE; HCC, HTN, HCV, TB, GERD; d/c 4/25                                                                                     | Y                                                                   | 11:15a<br>12:20p | 1 mg@<br>11:29a   | 1 mg@<br>11:28a    |
|         |    |         |                           |                                                                                                                                                     |                                                                     |                  | Sum 1<br>Ave 1    | Sum 1<br>Ave 1     |
| 4/23/13 | 81 | 60<br>M | Liver biopsy              | Admitted 4/23 as OP for liver bx; HTN, GERD, HCV, DM; d/c 4/23                                                                                      | Percocet<br>12/12/12 –<br>1/11/13                                   | 9:19a<br>11:10a  | 2 mg@<br>11:02a   | 2 mg@<br>11:02a    |
|         |    |         |                           |                                                                                                                                                     |                                                                     |                  | Sum 2<br>Ave 2    | Sum 2<br>Ave 2     |
| 4/23/13 | 82 | 34<br>M | Kidney biopsy             | Admitted 4/23 as OP for liver bx; pericardial effusion, anemia, CKD; d/c 4/24                                                                       | Y                                                                   | 9a<br>9:55a      | 1 mg@<br>9a       | 1 mg@<br>9a        |
|         |    |         |                           |                                                                                                                                                     |                                                                     |                  | Sum 1<br>Ave 1    | Sum 1<br>Ave 1     |
| 4/23/13 | 83 | 56<br>M | Kidney biopsy             | Admitted 4/23 as OP for kidney bx; HTN, CAD; d/c 4/23                                                                                               | Y                                                                   | 3p<br>3:30p      | 1 mg@<br>3:20p    | 1 mg@<br>3:20p     |
|         |    |         |                           |                                                                                                                                                     |                                                                     |                  | Sum 1<br>Ave 1    | Sum 1<br>Ave 1     |
| 4/23/13 | 84 | 45 F    | PCN replacement           | Admitted 4/23 for PCN replacement (it had been displaced); B hydronephrosis, cervical CA, HCV, GERDS; d/c 4/23                                      | Y                                                                   | 3:10p<br>5p      | 0.25 mg@<br>3:34p | 0.25 mg@<br>3:39p  |
|         |    |         |                           |                                                                                                                                                     |                                                                     |                  | Sum<br>.25        | Sum .25<br>Ave .25 |

|         |    |         |                                         |                                                                                                            |                                |                  |                                                          |                                                          |
|---------|----|---------|-----------------------------------------|------------------------------------------------------------------------------------------------------------|--------------------------------|------------------|----------------------------------------------------------|----------------------------------------------------------|
|         |    |         |                                         |                                                                                                            |                                |                  | Ave .25                                                  |                                                          |
| 4/22/13 | 85 | 65 F    | Lung biopsy                             | Admitted 4/22 for lung bx as an OP; kidney stones, HTN, CA; d/c 4/22                                       | Y                              | 10:55a<br>12:15p | 0.5 mg@<br>11:42a<br><br>Sum .5<br>Ave .5                | 0.5 mg@<br>11:41a<br><br>Sum .5<br>Ave .5                |
| 4/22/13 | 86 | 50M     | Brush biopsy                            | Admitted 4/13 as IP for obstructive jaundice; gastric CA; d/c 4/25                                         | Y                              | 10:19a<br>11:55a | 1 mg@<br>10:51a<br>1 mg@<br>11:40a<br><br>Sum 2<br>Ave 1 | 1 mg@<br>10:51a<br>1 mg@<br>11:40a<br><br>Sum 2<br>Ave 1 |
| 4/19/13 | 87 | 50M     | Cholangiogram and I-E catheter exchange | Admitted 4/13 as IP for obstructive jaundice; gastric CA; d/c 4/25                                         | Lortab<br>7/28/12 –<br>4/13/13 | 9:29a<br>10:45a  | 1 mg@<br>10:20a<br><br>Sum 1<br>Ave 1                    | 1 mg@<br>10:20a<br><br>Sum 1<br>Ave 1                    |
| 4/18/13 | 88 | 65F     | Abdominal drainage                      | Admitted 4/18 as IP for abdominal drainage; arthritis; d/c 4/24                                            | Y                              | 9:34a<br>10:34a  | 1 mg@<br>9:48a<br><br>Sum 1<br>Ave 1                     | 1 mg@<br>9:47a<br><br>Sum 1<br>Ave 1                     |
| 4/18/13 | 89 | 39<br>M | Tunneled dialysis catheter              | Admitted 3/22 as IP for septic shock, HIV, renal disorder; d/c 4/19                                        | Y                              | 3:38p<br>4:35p   | 1 mg@<br>3:51p<br><br>Sum 1<br>Ave 1                     | 1 mg@<br>3:51p<br><br>Sum 1<br>Ave 1                     |
| 4/17/13 | 90 | 45 F    | IVC filter placement                    | Admitted 4/17 as OP for IVC filter placement; fibroids, HTN, obesity, DM, high cholesterol, GERD; d/c 4/17 | Y                              | 9:14a<br>10:24a  | 1 mg@<br>9:23a<br>1 mg@<br>9:34a<br><br>Sum 2<br>Ave 1   | 1 mg@<br>9:22a<br>1 mg@<br>9:27a<br><br>Sum 2<br>Ave 1   |
| 4/16/13 | 91 | 67F     | PCN and abscess drainage                | Admitted 4/14 as IP for back pain and hardware infection; HTN, DM; d/c 5/11                                | Y                              | 3:09p<br>3:55p   | 1 mg@<br>3:13p<br><br>Sum 1<br>Ave 1                     | 1 mg@<br>3:29p<br><br>Sum 1<br>Ave 1                     |
| 4/15/13 | 92 | 70M     | PCNL                                    | Admitted 4/15 as IP for PCNL; HTN, CAD,                                                                    | Percocet<br>4/19/13 –          | 9:45a<br>11a     | 1 mg@<br>9:56a                                           | 1 mg@<br>9:55a                                           |

|         |    |     |                                          |                                                                                                                          |                                                                                                      |                  |                                    |                                                       |
|---------|----|-----|------------------------------------------|--------------------------------------------------------------------------------------------------------------------------|------------------------------------------------------------------------------------------------------|------------------|------------------------------------|-------------------------------------------------------|
|         |    |     |                                          | COPD, CHF; d/c 4/19                                                                                                      | 4/29/13                                                                                              |                  | 1 mg@<br>10:01a                    | 1 mg@<br>10a                                          |
|         |    |     |                                          |                                                                                                                          |                                                                                                      |                  | Sum 2<br>Ave 1                     | Sum 2<br>Ave 1                                        |
| 4/14/13 | 93 | 44M | Hip aspiration                           | Admitted 4/13 as IP for septic hip; IVDA, HCV; d/c 4/17                                                                  | Y                                                                                                    | 12:35a<br>1:10a  | 1 mg@<br>12:36a<br>1 mg@<br>12:41a | 1 mg@<br>12:35a<br>1 mg@<br>12:40a<br>2 mg@<br>12:47a |
|         |    |     |                                          |                                                                                                                          |                                                                                                      |                  | Sum 2<br>Ave 1                     | Sum 4<br>Ave 1.3                                      |
| 4/12/13 | 94 | 25M | Biopsy of thigh lesion and sacral lesion | Admitted 4/10 as IP for decub ulcer and swelling of LE; paraplegia, osteomyelitis, abscess, neurogenic bladder; d/c 4/21 | Y                                                                                                    | 12:55p<br>1:54p  | 1 mg@<br>12:55p                    | 1 mg@<br>12:55p                                       |
|         |    |     |                                          |                                                                                                                          |                                                                                                      |                  | Sum 1<br>Ave 1                     | Sum 1<br>Ave 1                                        |
| 4/10/13 | 95 | 50M | Lung biopsy                              | Admitted 4/9 as IP for lung mass; d/c 4/10                                                                               | Y                                                                                                    | 9:35a<br>12p     | 1 mg@<br>11:23a                    | 1 mg@<br>11:22a                                       |
|         |    |     |                                          |                                                                                                                          |                                                                                                      |                  | Sum 1<br>Ave 1                     | Sum 1<br>Ave 1                                        |
| 4/9/13  | 96 | 56M | Liver biopsy                             | Admitted 4/8 as IP for cirrhosis and liver lesion; DM, HTN, BPH, HCV, HCC, anemia, gallstones; d/c 4/10                  | Roxicet<br>3/28/13 –<br>4/10/13                                                                      | 9a<br>9:33a      | 1 mg@<br>9:10a<br>1 mg@<br>9:19a   | 1 mg@<br>9:10a<br>1 mg@<br>9:19a                      |
|         |    |     |                                          |                                                                                                                          |                                                                                                      |                  | Sum 2<br>Ave 1                     | Sum 2<br>Ave 1                                        |
| 4/9/13  | 97 | 54M | Lung biopsy                              | Admitted 4/9 for lung bx as OP; arthritis, Horner's syndrome, CA; d/c 4/9                                                | Norco<br>9/7/12 –<br>9/17/12<br>Vicodin<br>11/18/12 –<br>11/28/12<br>Percocet<br>3/28/13 –<br>4/8/13 | 11:16a<br>12:37p | 1 mg@<br>11:23a                    | 1 mg@<br>11:23a                                       |
|         |    |     |                                          |                                                                                                                          |                                                                                                      |                  | Sum 1<br>Ave 1                     | Sum 1<br>Ave 1                                        |
| 4/9/13  | 98 | 68F | Liver biopsy                             | Admitted 4/3 as IP for                                                                                                   | Y                                                                                                    | 9:36a            | 1 mg@                              | 1 mg@                                                 |

|         |     |     |                   |                                                                                 |                 |                  |                 |                |
|---------|-----|-----|-------------------|---------------------------------------------------------------------------------|-----------------|------------------|-----------------|----------------|
|         |     |     |                   | gallbladder mass; high cholesterol, HTN, CAD, hyperthyroidism, DM, CA; d/c 4/10 |                 | 11a              | 10:32a          | 10:32a         |
|         |     |     |                   |                                                                                 |                 |                  | Sum 1<br>Ave 1  | Sum 1<br>Ave 1 |
| 3/28/13 | 99  | 67F | Kidney biopsy     | Admitted 3/28 as OP for random kidney biopsy                                    | Y               | 9:13a<br>10a     | 1 mg@<br>9:45a  | 1 mg@<br>9:45a |
| 3/27/13 | 100 | 51M | Lymph node biopsy | Admitted 3/26 as OP for biopsy of lymphoid mass in the abdomen; lymphoma, DM    | Dilaudid<br>prn | 10:12a<br>11:28a | 1 mg@<br>10:27a | 0              |

\*Selected consecutively and retrospectively starting July 31, 2013

\*only cases done by BU and TM in IR, US, or CT suite

\*Patients older than 18 yo

\* no prisoners or committed mental patients included

\* patients who had been in house longer than 30 days were excluded from the study

\* Wong pain scale at the start of the procedure as per the flowsheet was used; the first pain rating at transfer was used; average of the scores in the in between period with the range was also recorded

\*dilaudid – administered by IR RN between start of procedure as per flowsheet and before transfer

\*N/V – zofran or Phenergan or recorded in nurses notes within 6 hrs of receiving dilaudid

\*patients receiving assistance from anesthesia were excluded

| Date    | Patient number | Age  | Procedure performed                | Pain rating                | N/V                                                          | Narcan | Floor               |
|---------|----------------|------|------------------------------------|----------------------------|--------------------------------------------------------------|--------|---------------------|
| 7/31/13 | 1              | 50 F | Abscess drainage                   | *5<br>**2.4 (0-5)<br>***0  | N                                                            | N      | Floor – no events   |
| 7/31/13 | 2              | 59 F | TLC                                | *0<br>**0.8 (0-7)<br>***0  | N                                                            | N      | Floor – no events   |
| 7/30/13 | 3              | 49 M | PCNL                               | *0<br>**0<br>***0          | N                                                            | N      | PACU – no events    |
| 7/29/13 | 4              | 49 M | PCNL                               | *7<br>**0<br>***0          | Zofran 4 mg<br>11:08a –<br>part of<br>anesthesia<br>protocol | N      | PACU/OR – no events |
| 7/29/13 | 5              | 61 F | Biliary drainage catheter exchange | *0<br>**0<br>***0          | N                                                            | N      | Floor – no events   |
| 7/26/13 | 6              | 57 F | R iliac bone biopsy                | *0<br>**0<br>***0          | Zofran 4<br>mg@2:27p –<br>CA                                 | N      | Floor – no events   |
| 7/26/13 | 7              | 32 F | L5 biopsy                          | *0<br>**0<br>***0          | N                                                            | N      | PACU – no events    |
| 7/25/13 | 8              | 27 M | Infrapatellar biopsy               | *10<br>**2.6 (0-8)<br>***0 | N                                                            | N      | Floor – no events   |
| 7/24/13 | 9              | 36 F | Paraortic biopsy                   | *5<br>**1.5 (0-5)<br>***0  | N                                                            | N      | Floor – no events   |
| 7/23/13 | 10             | 50 M | Deep pelvic and RLQ drainages      | *0<br>**0.8 (0-4)<br>***0  | N                                                            | N      | Floor – no events   |
| 7/23/13 | 11             | 64 F | Liver biopsy                       | *0<br>**0<br>***0          | N                                                            | N      | Floor – no events   |
| 7/22/13 | 12             | 67 F | Ascites drainage                   | *0<br>**0<br>***0          | N                                                            | N      | Floor – no events   |
| 7/22/13 | 13             | 43 M | Left pleural effusion drainage     | *0<br>**2.7 (0-4)<br>***0  | N                                                            | N      | Floor – no events   |
| 7/19/13 | 14             | 57 M | PCNL                               | *0<br>**0<br>***0          | N                                                            | N      | PACU – no events    |
| 7/17/13 | 15             | 55 M | PICC                               | *0                         | N                                                            | N      | Floor – no          |



|         |    |      |                             |                                   |                                                                  |   |                           |
|---------|----|------|-----------------------------|-----------------------------------|------------------------------------------------------------------|---|---------------------------|
|         |    |      |                             | **0<br>***0                       |                                                                  |   | events                    |
| 7/16/13 | 16 | 29 M | Hepatic artery embolization | *0<br>**0.5 (0-8)<br>***0         | Zofran 4 mg @5:15p – anesthesia protocol                         | N | Floor/OR/TICU – no events |
| 7/16/13 | 17 | 28 M | Toe biopsy                  | *0<br>**0<br>***0                 | N                                                                | N | Floor – no events         |
| 7/12/13 | 18 | 58 M | chemoembo                   | *0<br>**0<br>***0                 | N                                                                | N | PACU – no events          |
| 7/11/13 | 19 | 49 F | Permacath                   | *0<br>**0<br>***0                 | N                                                                | N | Floor – no events         |
| 7/10/13 | 20 | 45 F | PCN                         | *7<br>**3 (0-7)<br>***0           | N                                                                | N | Floor – no events         |
| 7/9/13  | 21 | 54 M | Liver biopsy                | *0<br>**0<br>***0                 | N                                                                | N | PACU = no events          |
| 7/8/13  | 22 | 70 M | Lung biopsy                 | *0<br>**0.7 (0-4)<br>***0         | N                                                                | N | PACU – no events          |
| 7/5/13  | 23 | 61 M | Liver biopsy                | *0<br>**0<br>***0                 | N                                                                | N | PACU – no events          |
| 7/3/13  | 24 | 55 M | Liver biopsy                | *0<br>**0<br>***0                 | N                                                                | N | PACU – no events          |
| 7/2/13  | 25 | 62 F | Lung biopsy                 | *0<br>**0<br>***0                 | N                                                                | N | PACU – no events          |
| 7/2/13  | 26 | 38 M | Abscess drainage            | *8<br>**3.6 (0 - 10)<br>***0 = 27 | N                                                                | N | Floor – no events         |
| 7/2/13  | 27 | 55 F | Lung biopsy                 | *0<br>**0<br>***0                 | Zofran 4 mg@ 4:54p – no Zofran on prn list, nno other narcotics, | N | PACU – no events          |

|         |    |      |                                  |                            |                                                                               |   |                      |
|---------|----|------|----------------------------------|----------------------------|-------------------------------------------------------------------------------|---|----------------------|
|         |    |      |                                  |                            | nno prior<br>c/o N/V, no<br>other PMH<br>that could<br>cause N/V              |   |                      |
| 7/1/13  | 28 | 40 M | Peripancreatic<br>biopsy         | *0<br>**0<br>***0          | N                                                                             | N | Floor – no<br>events |
| 7/1/13  | 29 | 56 F | Liver biopsy                     | *0<br>**0<br>***0          | N                                                                             | N | PACU – no<br>events  |
| 7/1/13  | 30 | 25 F | Left pleural<br>drainage         | *0<br>**0.5 (0 -5)<br>***0 | N                                                                             | N | Floor – no<br>events |
| 7/1/13  | 31 | 24 M | Pelvic mass<br>biopsy            | *0<br>**0<br>***0          | Zofran 4 mg<br>IV 5:38 P<br>Patient with<br>CA                                | N | Floor – no<br>events |
| 6/28/13 | 32 | 39 F | Abscess<br>drainage              | *0<br>**0<br>***0          | N                                                                             | N | Floor – no<br>events |
| 6/26/13 | 33 | 56 F | Abscess<br>drainage              | *0<br>**0<br>***0          | N                                                                             | N | Floor – no<br>events |
| 6/24/13 | 34 | 53 M | Kidney biopsy                    | *0<br>**0<br>***0          | Phenergan<br>25 mg –<br>allergic to<br>versed –<br>could have<br>for sedation | N | PACU – no<br>events  |
| 6/19/13 | 35 | 61 M | Tunneled<br>dialysis<br>catheter | *0<br>**0<br>***0          | N                                                                             | N | Floor – no<br>events |
| 6/18/13 | 36 | 48 F | Tunneled<br>dialysis<br>catheter | *0<br>**0<br>***0          | N                                                                             | N | Floor – no<br>events |
| 6/17/13 | 37 | 53 F | Tunneled<br>dialysis<br>catheter | *0<br>**0<br>***0          | N                                                                             | N | Floor – no<br>events |
| 6/13/13 | 38 | 56 F | Liver biopsy                     | *0<br>**0<br>***0          | N                                                                             | N | PACU – no<br>events  |
| 6/13/13 | 39 | 38 F | Tunneled                         | *0                         | N                                                                             | N | Floor – no           |

|         |    |      |                            |                           |                                                               |   |                        |
|---------|----|------|----------------------------|---------------------------|---------------------------------------------------------------|---|------------------------|
|         |    |      | dialysis catheter          | **0<br>***0               |                                                               |   | events                 |
| 6/12/13 | 40 | 53 F | Abscess drainage           | *0<br>**0.9 (0-4)<br>***0 | N                                                             | N | Floor – no events      |
| 6/11/13 | 41 | 50 M | Biliary exchange           | *0<br>**0<br>***0         | N                                                             | N | Floor/TICU – no events |
| 6/5/13  | 42 | 40 F | Liver biopsy               | *0<br>**0<br>***0         | N                                                             | N | PACU – no events       |
| 6/5/13  | 43 | 57 M | Hepatic angiogram          | *2<br>**0.2 (0-2)<br>***0 | N                                                             | N | PACU – no events       |
| 6/3/13  | 44 | 53 M | Renal biopsy               | *0<br>**0<br>***0         | N                                                             | N | PACU – no events       |
| 6/3/13  | 45 | 61 F | I-E biliary drain          | *0<br>**1.3 (0-5)<br>***0 | N                                                             | N | PACU – no events       |
| 5/30/13 | 46 | 60 F | Liver biopsy               | *0<br>**0<br>***0         | Zofran 4 mg IV@ 4:52p – no other causes for N/V               | N | PACU – no events       |
| 5/30/13 | 47 | 62 F | LN biopsy                  | *0<br>**0<br>***2         | N                                                             | N | Floor – no events      |
| 5/30/13 | 48 | 60 M | chemoembo                  | *0<br>**0<br>***0         | Zofran 4 mg@ 12:29p – CA, N/V at other times during admission | N | PACU – no events       |
| 5/29/13 | 49 | 59 M | RUQ biopsy                 | *0<br>**0.7 (0-5)<br>***0 | N                                                             | N | Floor – no events      |
| 5/29/13 | 50 | 90 F | B PCN                      | *0<br>**0<br>***6         | N                                                             | N | Floor – no events      |
| 5/25/13 | 51 | 58 M | Tunneled dialysis catheter | *0<br>**0<br>***0         | N                                                             | N | Floor – no events      |

|         |    |      |                                  |                           |   |   |                                                                                                                                                                                                                                                                                                                                                           |
|---------|----|------|----------------------------------|---------------------------|---|---|-----------------------------------------------------------------------------------------------------------------------------------------------------------------------------------------------------------------------------------------------------------------------------------------------------------------------------------------------------------|
| 5/23/13 | 52 | 35 M | Perihepatic and pelvic drainages | *0<br>**0<br>***0         | N | N | Floor – no events                                                                                                                                                                                                                                                                                                                                         |
| 5/17/13 | 53 | 64 M | Tunneled dialysis catheter       | *0<br>**0<br>***0         | N | N | Floor/dialysis – no events                                                                                                                                                                                                                                                                                                                                |
| 5/17/13 | 54 | 62 M | Tunneled dialysis catheter       | *0<br>**0<br>***0         | N | N | PACU – no events                                                                                                                                                                                                                                                                                                                                          |
| 5/16/13 | 55 | 28 F | Lung biopsy                      | *0<br>**0<br>***0         | N | N | PACU – no events                                                                                                                                                                                                                                                                                                                                          |
| 5/14/13 | 56 | 45 M | Liver biopsy                     | *6<br>**0<br>***0         | N | N | PACU – no events                                                                                                                                                                                                                                                                                                                                          |
| 5/10/13 | 57 | 56 M | RPCN                             | *5<br>**0.3 (0-5)<br>***0 | N | N | <b>Floor/ER. At 3:26 p sats went to 89-91% and was drowsy but arousable and NAD. Pt had h/o bladder resection and had a right solitary kidney with obstruction at anastomosis – pt had PCN then admitted to urology; 98-100% O2 sat after 100% NR placed; PCN was placed at 2:30 p and Cr 3.5 at admission (baseline 2.3) with perinephric STS; other</b> |

|         |    |      |                            |                   |                                                                            |   |                                                                                                                                                                                   |
|---------|----|------|----------------------------|-------------------|----------------------------------------------------------------------------|---|-----------------------------------------------------------------------------------------------------------------------------------------------------------------------------------|
|         |    |      |                            |                   |                                                                            |   | <b>PMH: HTN, DM; O2 sat 94-100% until 2:35 p on 2 L NC; 93% and 93% at 2:40 p and 2:50 p; 98% at 5:20 p Most likely respiratory depression after stimulus of procedure d/c'ed</b> |
| 5/10/13 | 58 | 46 F | Tunneled dialysis catheter | *0<br>**0<br>***0 | Zofran 4 mg@ 11:32a – admitted with c/o N/V; ESRD                          | N | <b>Floor/dialysis – low BP on dialysis per MD ie 1:30 p 79/40, 63/42, 80/50, 70/46; 1 p and before 96/54, 176/106 129/79 at 8 p TDC placed 11 am</b>                              |
| 5/9/13  | 59 | 27 M | Kidney biopsy              | *0<br>**0<br>***0 | N                                                                          | N | PACU – no events                                                                                                                                                                  |
| 5/8/13  | 60 | 53 M | Left axillary mass biopsy  | *0<br>**0<br>***0 | N                                                                          | N | Floor – no events                                                                                                                                                                 |
| 5/8/13  | 61 | 25 M | Left psoas drainage        | *0<br>**0<br>***0 | N                                                                          | N | Floor – no events                                                                                                                                                                 |
| 5/7/13  | 62 | 56 F | Liver biopsy               | *0<br>**0<br>***0 | Zofran 4 mg@ 11:59p, phenergan 12.5 mg@ 12:58p – no n/v before bx; has DM, | N | PACU – no events                                                                                                                                                                  |

|         |    |      |                                  |                                  |                                                  |   |                               |
|---------|----|------|----------------------------------|----------------------------------|--------------------------------------------------|---|-------------------------------|
|         |    |      |                                  |                                  | HBV, HTN,<br>HLD, r/o<br>autoimmune<br>hepatitis |   |                               |
| 5/6/13  | 63 | 44 M | biloma                           | *0<br>**0<br>***0                | N                                                | N | Floor – no<br>events          |
| 5/3/13  | 64 | 61 F | Pleural<br>effusion<br>drainage  | *0<br>**0<br>***0                | N                                                | N | Floor – no<br>events          |
| 5/2/13  | 65 | 63 M | Lung biopsy                      | *0<br>**0<br>***0                | N                                                | N | PACU – no<br>events           |
| 5/2/13  | 66 | 60 M | LN biopsy                        | *0<br>**0<br>***0                | N                                                | N | Floor/dialysis<br>– no events |
| 5/2/13  | 67 | 50 M | Tunneled<br>dialysis<br>catheter | *0<br>**0<br>***0                | N                                                | N | Floor – no<br>events          |
| 5/1/13  | 68 | 57 F | Liver biopsy                     | *0<br>**0<br>***0                | N                                                | N | PACU – no<br>events           |
| 4/30/13 | 69 | 61 F | Lung biopsy                      | *0<br>**0<br>***0                | N                                                | N | PACU – no<br>events           |
| 4/30/13 | 70 | 52 F | Liver biopsy                     | *0<br>**0<br>***0                | N                                                | N | PACU – no<br>events           |
| 4/30/13 | 71 | 44 M | Biloma<br>drainage               | *10<br>**6.6 (2-<br>10)<br>***10 | N                                                | N | Floor – no<br>events          |
| 4/30/13 | 72 | 24 M | IVC filter<br>removal            | *0<br>**0<br>***0                | N                                                | N | Floor – no<br>events          |
| 4/29/13 | 73 | 58 M | Liver biopsy                     | *0<br>**0<br>***0                | N                                                | N | PACU – no<br>events           |
| 4/29/13 | 74 | 62 M | Lung biopsy                      | *0<br>**0<br>***0                | N                                                | N | PACU – no<br>events           |
| 4/29/13 | 75 | 49 F | TJLB                             | *0<br>**0                        | N                                                | N | PACU – no<br>events           |

|         |    |      |                                         |                           |                                                                            |   |                      |
|---------|----|------|-----------------------------------------|---------------------------|----------------------------------------------------------------------------|---|----------------------|
|         |    |      |                                         | ***0                      |                                                                            |   |                      |
| 4/25/13 | 76 | 39 F | Liver biopsy                            | *0<br>**0<br>***0         | N                                                                          | N | PACU – no events     |
| 4/24/13 | 77 | 44 M | Lung bx                                 | *0<br>**0<br>***0         | N                                                                          | N | PACU – no events     |
| 4/24/13 | 78 | 57 M | Liver bx                                | *0<br>**1 (0-4)<br>***0   | N                                                                          | N | PACU – no events     |
| 4/24/13 | 79 | 28 M | Tunneled catheter removal               | *8<br>**2 (0-8)<br>***0   | Vomited at 12:19pm but no Zofran given; no PMH suggestive of need to vomit | N | Floor – no events    |
| 4/24/13 | 80 | 60 M | Chemoembo                               | *0<br>**0<br>***0         | N                                                                          | N | PACU – no events     |
| 4/23/13 | 81 | 60 M | Liver biopsy                            | *0<br>**1 (0-6)<br>***0   | N                                                                          | N | PACU – no events     |
| 4/23/13 | 82 | 34 M | Kidney biopsy                           | *0<br>**0<br>***0         | N                                                                          | N | PACU – no events     |
| 4/23/13 | 83 | 56 M | Kidney biopsy                           | *0<br>**0<br>***0         | N                                                                          | N | PACU – no events     |
| 4/23/13 | 84 | 45 F | PCN replacement                         | *0<br>**4.6 (0-8)<br>***8 | N                                                                          | N | Floor/ER – no events |
| 4/22/13 | 85 | 65 F | Lung biopsy                             | *0<br>**0<br>***0         | N                                                                          | N | PACU – no events     |
| 4/22/13 | 86 | 50M  | Brush biopsy                            | *0<br>**0<br>***0         | N                                                                          | N | PACU – no events     |
| 4/19/13 | 87 | 50M  | Cholangiogram and I-E catheter exchange | *0<br>**0<br>***0         | N                                                                          | N | Floor – no events    |

|         |     |      |                                          |                           |                                                         |   |                        |
|---------|-----|------|------------------------------------------|---------------------------|---------------------------------------------------------|---|------------------------|
| 4/18/13 | 88  | 65F  | Abdominal drainage                       | *0<br>**0<br>***0         | Zofran 4 mg@ 12:57p – no other N/V, nothing else in PMH | N | Floor – no events      |
| 4/18/13 | 89  | 39 M | Tunneled dialysis catheter               | *8<br>**4.4 (0-8)<br>***0 | N                                                       | N | Floor – no events      |
| 4/17/13 | 90  | 45 F | IVC filter placement                     | *0<br>**0<br>***0         | N                                                       | N | Floor – no events      |
| 4/16/13 | 91  | 67F  | PCN and abscess drainage                 | *6<br>**1.3 (0-6)<br>***0 | N                                                       | N | Floor – no events      |
| 4/15/13 | 92  | 70M  | PCNL                                     | *0<br>**0<br>***0         | Zofran 4 mg@ 3:17p – operative protocol                 | N | PACU to OR – no events |
| 4/14/13 | 93  | 44M  | Hip aspiration                           | *2<br>**2.2 (0-8)<br>***2 | N                                                       | N | Floor – no events      |
| 4/12/13 | 94  | 25M  | Biopsy of thigh lesion and sacral lesion | *0<br>**0<br>***0         | N                                                       | N | Floor – no events      |
| 4/10/13 | 95  | 50M  | Lung biopsy                              | *0<br>**0<br>***0         | N                                                       | N | PACU – no events       |
| 4/9/13  | 96  | 56M  | Liver biopsy                             | *0<br>**0<br>***0         | N                                                       | N | PACU – no events       |
| 4/9/13  | 97  | 54M  | Lung biopsy                              | *6<br>**2 (0-3)<br>***0   | N                                                       | N | PACU – no events       |
| 4/9/13  | 98  | 68F  | Liver biopsy                             | *0<br>**0<br>***0         | N                                                       | N | PACU – no events       |
| 3/28/13 | 99  | 67F  | Kidney biopsy                            | *0<br>**0<br>***0         | Vomited at 12:37 p; no Zofran given                     | N | PACU – no events       |
| 3/26/13 | 100 | 51M  | Lymph node biopsy                        | *4<br>**0<br>***0         | N                                                       | N | Floor – no events      |

|      |     |          |
|------|-----|----------|
| Date | MRN | Operator |
|------|-----|----------|



|         |            |    |
|---------|------------|----|
| 7/31/13 | 1001472605 | BU |
| 7/31/13 | 1000707234 | TM |
| 7/30/13 | 1001944386 | TM |
| 7/29/13 | 1001944386 | TM |
| 7/29/13 | 1002174159 | TM |
| 7/26/13 | 1001973261 | TM |
| 7/26/13 | 1001966520 | TM |
| 7/25/13 | 1002248747 | TM |
| 7/24/13 | 1001306409 | TM |
| 7/23/13 | 1001072971 | TM |
| 7/23/13 | 1002100701 | TM |
| 7/22/13 | 1000310545 | TM |
| 7/22/13 | 1001949137 | TM |
| 7/19/13 | 1002103724 | TM |
| 7/17/13 | 1001172728 | TM |
| 7/16/13 | 1002250973 | TM |
| 7/16/13 | 1000989166 | TM |
| 7/12/13 | 1001111095 | BU |
| 7/11/13 | 1001591862 | BU |
| 7/10/13 | 1000783724 | BU |
| 7/9/13  | 1000348896 | TM |
| 7/8/13  | 1001074215 | BU |
| 7/5/13  | 1000440428 | BU |
| 7/3/13  | 1002247376 | BU |
| 7/2/13  | 1002236826 | TM |
| 7/2/13  | 1001933754 | BU |
| 7/2/13  | 1002240966 | TM |
| 7/1/13  | 1001996354 | BU |
| 7/1/13  | 1000523309 | BU |
| 7/1/13  | 1001963396 | TM |
| 7/1/13  | 1001979154 | BU |
| 6/28/13 | 1000403711 | BU |
| 6/26/13 | 1000637077 | BU |
| 6/24/13 | 1001079363 | BU |
| 6/19/13 | 1001164753 | BU |
| 6/18/13 | 1000017816 | BU |
| 6/17/13 | 1000301558 | TM |
| 6/13/13 | 1001756313 | BU |
| 6/13/13 | 1000469784 | TM |

|         |            |    |
|---------|------------|----|
| 6/12/13 | 1001933429 | BU |
| 6/11/13 | 1002135747 | TM |
| 6/5/13  | 1001504542 | TM |
| 6/5/13  | 1001256588 | BU |
| 6/3/13  | 1001079363 | TM |
| 6/3/13  | 1002174159 | BU |
| 5/30/13 | 1001034031 | TM |
| 5/30/13 | 1002222044 | TM |
| 5/30/13 | 1001988696 | BU |
| 5/29/13 | 1002238167 | BU |
| 5/29/13 | 1002222680 | TM |
| 5/25/13 | 1000045541 | BU |
| 5/23/13 | 1001298684 | TM |
| 5/17/13 | 1000566433 | TM |
| 5/17/13 | 1001561310 | TM |
| 5/16/13 | 1001674175 | BU |
| 5/14/13 | 1001066013 | BU |
| 5/10/13 | 1000632581 | BU |
| 5/10/13 | 1000017816 | BU |
| 5/9/13  | 1001024847 | BU |
| 5/8/13  | 1002232866 | BU |
| 5/8/13  | 1001923720 | BU |
| 5/7/13  | 1001937037 | TM |
| 5/6/13  | 1002230392 | BU |
| 5/3/13  | 1001167467 | BU |
| 5/2/13  | 1002221311 | BU |
| 5/2/13  | 1001514701 | BU |
| 5/2/13  | 1000101841 | TM |
| 5/1/13  | 1000288241 | BU |
| 4/30/13 | 1000376876 | BU |
| 4/30/13 | 1000662977 | BU |
| 4/30/13 | 1002230392 | BU |

|         |            |    |
|---------|------------|----|
| 4/30/13 | 1001865669 | TM |
| 4/29/13 | 1000639715 | BU |
| 4/29/13 | 1000243039 | BU |
| 4/29/13 | 1001930649 | TM |
| 4/25/13 | 1001239899 | TM |
| 4/24/13 | 1000017065 | BU |
| 4/24/13 | 1001256588 | BU |
| 4/24/13 | 1000703493 | BU |
| 4/24/13 | 1001988696 | BU |
| 4/23/13 | 1000647988 | TM |
| 4/23/13 | 1000199071 | TM |
| 4/23/13 | 1001945323 | TM |
| 4/23/13 | 1000783724 | BU |
| 4/22/13 | 1002224765 | TM |
| 4/22/13 | 1002135747 | BU |
| 4/19/13 | 1002135747 | BU |
| 4/18/13 | 1000826562 | BU |
| 4/18/13 | 1000022323 | BU |
| 4/17/13 | 1000446359 | TM |
| 4/16/13 | 1000393858 | TM |
| 4/15/13 | 1000514934 | TM |
| 4/14/13 | 1000394392 | TM |
| 4/12/13 | 1000995749 | TM |
| 4/10/13 | 1000569894 | BU |
| 4/9/13  | 1000093631 | BU |

|         |            |    |
|---------|------------|----|
|         |            |    |
| 4/9/13  | 1002100441 | BU |
| 4/9/13  | 1001517332 | BU |
| 3/28/13 | 1000686770 | TM |
| 3/26/13 | 1000533700 | TM |

*BU – 53*

*TM - 47*
